# Supplementary material for: The DNA controllable peroxidase mimetic activity of MoS2 nanosheets for constructing a robust colorimetric biosensor
Source: Royal Society of Chemistry journal article supplement (doi:10.1039/d0nr05649a), 2020-01-01
Supplement: d0nr05649a1.pdf [file d0nr05649a1.pdf]

## Supporting information

# **DNA controllable peroxidase mimetic activity of MoS<sub>2</sub> nanosheets for constructing robust colorimetric biosensor**

Lianjing Zhao, Jing Wang, Dandan Su, Yueying Zhang, Huiying Lu, Xu Yan,\* Jihao Bai, Yuan Gao\* and Geyu Lu\*

State Key Laboratory on Integrated Optoelectronics, College of Electronic Science and Engineering, Jilin University, 2699 Qianjin Street, Changchun 130012, China

\*Corresponding authors:

Xu Yan, Tel.: +86 431 85167808

Email: yanx@jlu.edu.cn (X. Yan)

Yuan Gao, Tel.: +86 431 85168384;

Email: gaoyuan@jlu.edu.cn (Y. Gao).

Geyu Lu, Tel.: +86 431 85167808;

Email: luyg@jlu.edu.cn (G. Lu).

## **Additional experimental details**

**Hydroxyl radical scavenging measurement.** ESR spectrometer was utilized to detect hydroxyl radical under different conditions. DMPO was used to trap hydroxyl radical ( $\cdot\text{OH}$ ) to form DMPO/ $\cdot\text{OH}$  spin adduct. The sample was prepared by separately adding various reagents (such as 100  $\mu\text{g}/\text{mL}$   $\text{MoS}_2$ , 10  $\text{mM}$   $\text{Fe}^{2+}$  or 10  $\mu\text{M}$  DNA) into the mixture of  $\text{H}_2\text{O}_2$  (200  $\text{mM}$ ) and DMPO (50  $\text{mM}$ ), and then ESR spectra measurements were conducted at room temperature.

**Electrochemistry measurements.** The three-electrode system was utilized for electrochemistry experiments, which was composed of platinum plate as auxiliary electrode,  $\text{Ag}/\text{AgCl}$  as reference electrode and glassy carbon as working electrodes. The  $\text{MoS}_2$  NSs (10  $\mu\text{L}$ , 1 $\text{mg}/\text{ml}$ ) were dropped on the surface of polished glassy carbon electrode. After drying for 2 hours at room temperature, Nafion (2  $\mu\text{L}$ , 5 wt%) was pipetted on it to prepare  $\text{MoS}_2$  NSs modified electrodes. The cyclic voltammetric measurement of bare or  $\text{MoS}_2$  NSs modified electrode was conducted in the 0.1 M phosphate buffer (pH 7.0) in the presence of 10  $\text{mM}$   $\text{H}_2\text{O}_2$ . All test solution was saturated with nitrogen by bubbling highly pure nitrogen for 30 min to eliminate oxygen interference.

**CEA Detection in serum samples.** CEA detection in serum samples was carried out through standard addition method. In brief, CEA (500  $\text{ng}/\text{mL}$ ), 2  $\mu\text{L}$  100-fold dilution of serum samples, and the mixture of CEA (500  $\text{ng}/\text{mL}$ ) and 2  $\mu\text{L}$  100-fold dilution of serum samples was separately incubated with 25  $\mu\text{g}/\text{mL}$  aptamer modified  $\text{MoS}_2$  NSs in 10 $\text{mM}$  Tris-HCl buffer at 37  $^\circ\text{C}$  for 30 minutes. Then the above reaction mixture was added in 0.1M acetate buffer (pH 4.0) containing 0.2  $\text{mM}$   $\text{H}_2\text{O}_2$  and 0.4  $\text{mM}$  TMB. After 15 minutes incubation at 37  $^\circ\text{C}$ , the UV-vis absorption spectrum was determined immediately.

**Preparation of portable test kits and visual detection of CEA.** The portable test kit for CEA detection was prepared as follows: agarose (20  $\text{mg}$ ) was dissolved in boiling water (2 $\text{mL}$ ). When the solution was cooled to 40  $^\circ\text{C}$ , the hybrid of 7.5  $\mu\text{L}$   $\text{MoS}_2$

NSs (1 mg/mL) and 30  $\mu$ L CEA aptamer (25  $\mu$ M), 30  $\mu$ L TMB (20 mM) were added and mixed. The mixture solution (200  $\mu$ L) was transferred into the cap of the microcentrifuge tube. The hydrogel was shaped after drying under ambient temperature for 5 minutes. For CEA detection, 50  $\mu$ L CEA with different concentrations was added in the hydrogel. After 60 minutes incubation at 37  $^{\circ}$ C, 30  $\mu$ L H<sub>2</sub>O<sub>2</sub> (10 mM) and 300  $\mu$ L 0.1M acetate buffer (pH 4.0) were added into the test kit. After closing the cap, the test kit was turned upside down and incubated at 37  $^{\circ}$ C for 60 minutes.

**DNA adsorption.** DNA adsorption by MoS<sub>2</sub> nanosheets was investigated by monitoring the change of fluorescence signal of cy5-DNA solution after the addition of MoS<sub>2</sub> nanosheets. The fluorescence intensity at 662 nm of 75 nM Cy5-DNA solution before adding MoS<sub>2</sub> nanosheets was monitored for 10 min as initial intensity. The effect of salt concentration on the kinetics of DNA adsorption was investigated by detecting the change of fluorescence intensity of 75 nM Cy5-DNA in 10 mM Tris solution with various salt concentrations after adding MoS<sub>2</sub> NSs (15  $\mu$ g/mL).

**DNA desorption.** The 75 nM Cy5-DNA in 10mM Tris-HCl buffer (containing 100 mM NaCl, 5 mM KCl and 5 mM MgCl<sub>2</sub>) was incubated with MoS<sub>2</sub> NSs (15  $\mu$ g/mL) for 10 min at room temperature. The fluorescence intensity at 662 nm of the mixture was monitored for 10 min as initial intensity. The precipitation was collected by centrifugation the above mixture and then dispersed in 100  $\mu$ L Tris-HCl buffer. Various reagents, including 10 mM NaOH, 10 mM phosphate, 1 mM guanosine, 5 M urea, 50% DMSO, 0.01% CTAB, 0.01% SDS, 0.01% Tween 20 and 0.01% Triton X-100, were separately added in the dispersion to induce DNA desorption. Subsequently, the fluorescence intensity was determined immediately.

## Supporting figures

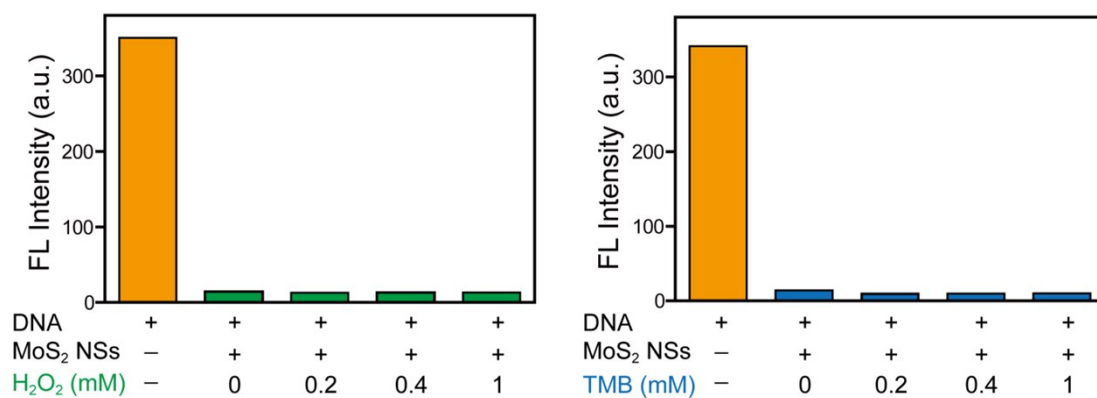

**Fig. S1** The effect of different H<sub>2</sub>O<sub>2</sub> and TMB on Cy5 labeled DNA adsorption by MoS<sub>2</sub> NSs.

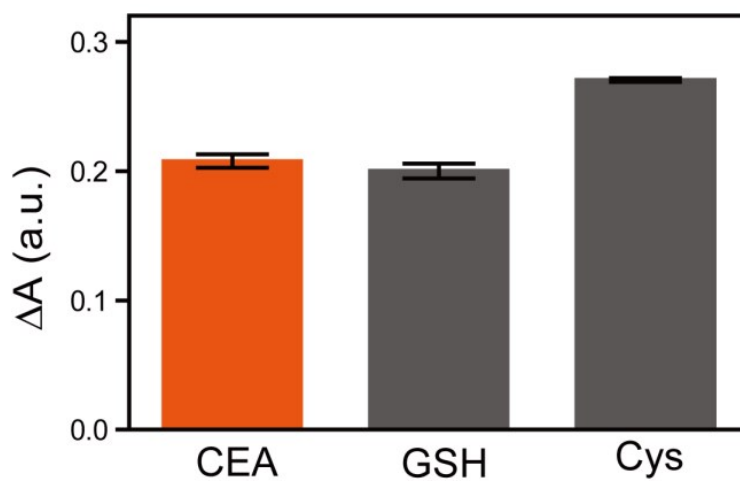

**Fig. S2** specificity of the proposed biosensor for glutathione and cysteine.

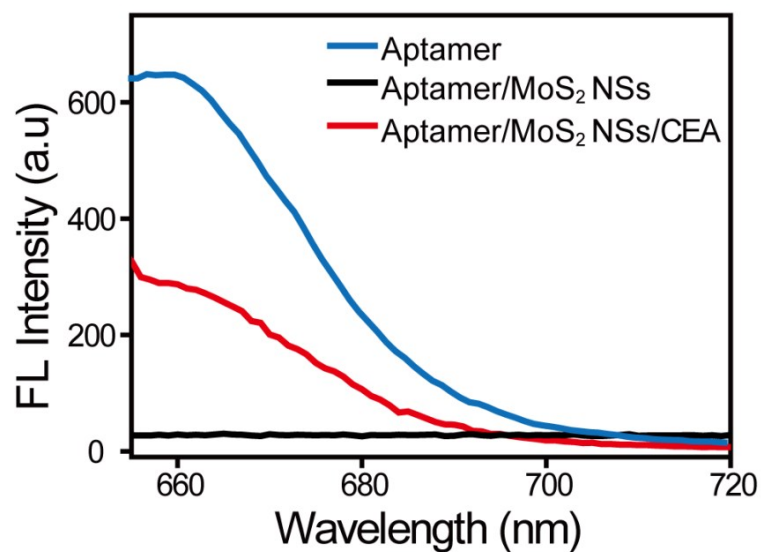

**Fig. S3** Fluorescent spectra of cy5 labeled CEA aptamer under different system.

**Table S1** Comparison of steady kinetic parameters of MoS<sub>2</sub> NSs and DNA/MoS<sub>2</sub> NSs nanozymes.

| Catalyst                 | Substrate                     | K <sub>m</sub> (mM) | V <sub>max</sub> (10 <sup>-8</sup> M/s) |
|--------------------------|-------------------------------|---------------------|-----------------------------------------|
| MoS <sub>2</sub> NSs     | H <sub>2</sub> O <sub>2</sub> | 0.0058              | 1.2095                                  |
| DNA/MoS <sub>2</sub> NSs | H <sub>2</sub> O <sub>2</sub> | 0.0348              | 5.8955                                  |
| MoS <sub>2</sub> NSs     | TMB                           | 2.9755              | 9.3301                                  |
| DNA/MoS <sub>2</sub> NSs | TMB                           | 0.6518              | 10.5474                                 |
